# Supplementary material for: Deep sequencing-based microRNA expression signatures in head and neck squamous cell carcinoma: dual strands of pre-miR-150 as antitumor miRNAs
Source: PubMed Central journal article supplement (PMC5444743; doi:10.18632/oncotarget.16327), 2017-03-17
Supplement: oncotarget-08-30288-s001.pdf [file oncotarget-08-30288-s001.pdf]

# Deep sequencing-based microRNA expression signatures in head and neck squamous cell carcinoma: dual strands of pre-*miR-150* as antitumor miRNAs

## Supplementary Materials

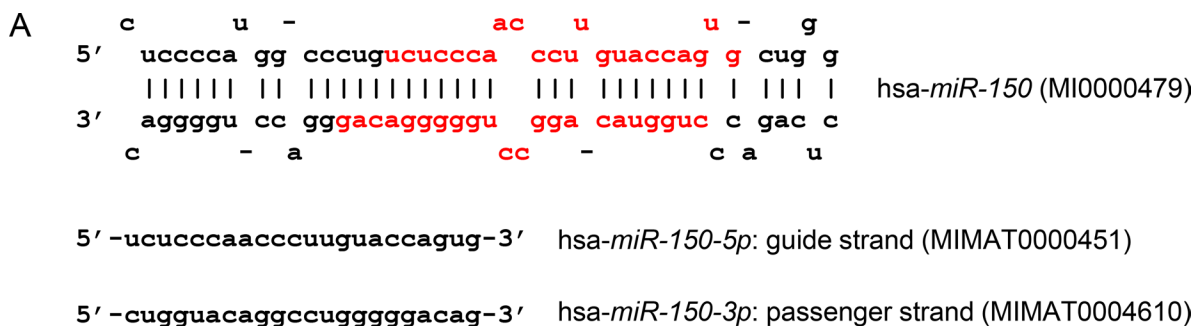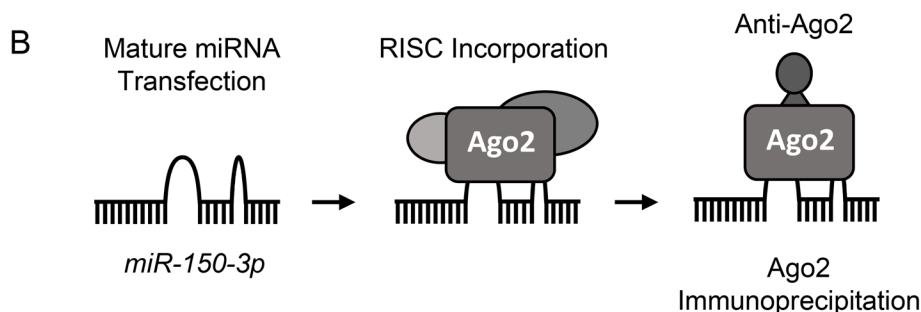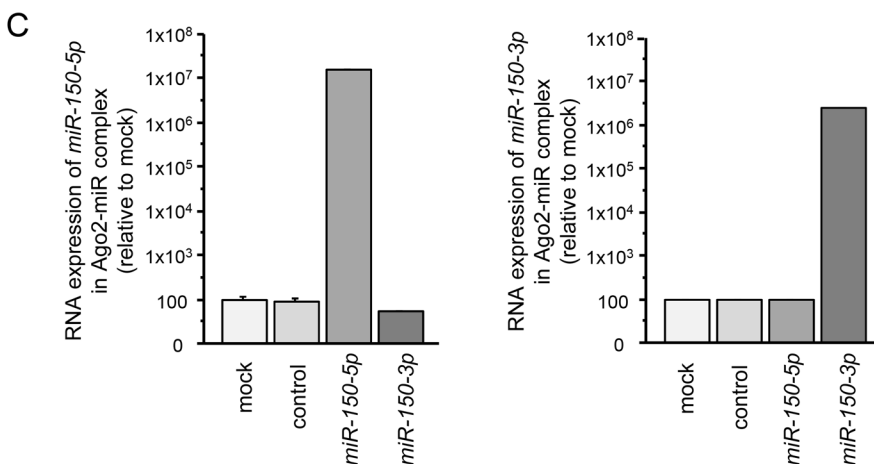

**Supplementary Figure 1: Both strands of *miR-150-5p* and *miR-150-3p* incorporated into RISC.** (A) Stem-loop sequence of *miR-150* with red characters indicating mature miRNAs was shown. Mature miRNA sequences of *miR-150-5p* and *miR-150-3p* were shown, *miR-150-5p* was recognized as guide strand, whether *miR-150-3p* as passenger strand by miRBase (<http://www.mirbase.org/>). (B) Schematic illustration of miRNA detection method. Isolation of RISC incorporated miRNAs by Ago2 immunoprecipitation. (C) Expression levels of *miR-150-5p* and *miR-150-3p* after transfection with *miR-150-5p* or *miR-150-3p* following immunoprecipitation by Ago2 ( $P < 0.0001$ ).

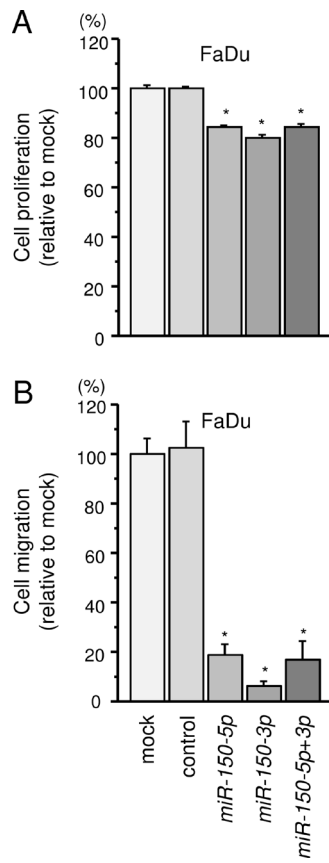

**Supplementary Figure 2: The synergistic effects of *miR-150-5p* and *miR-150-3p* on HNSCC cells.** (A) Cell proliferation was determined by XTT assay 72 h after transfection with 10 nM *miR-150-5p* and *miR-150-3p*. \* $P < 0.0001$ . (B) Cell movement was assessed by migration assay 48 h after transfection with 10 nM *miR-150-5p* and *miR-150-3p*. \* $P < 0.0001$ .

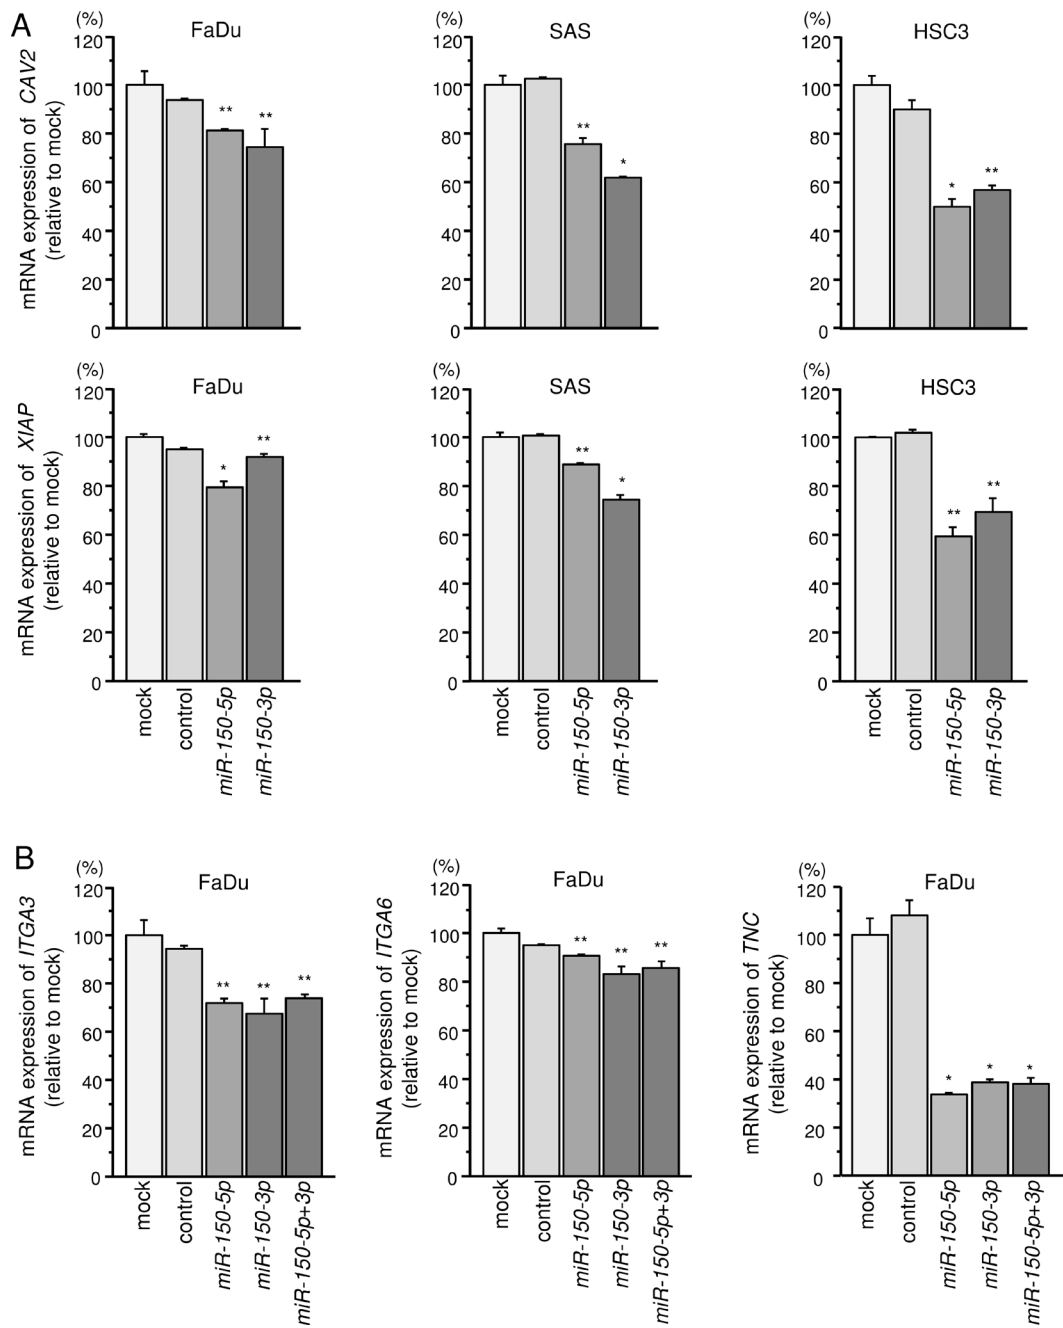

**Supplementary Figure 3: Regulation of target gene expression by *miR-150-5p* and *miR-150-3p* and the synergistic effects of *miR-150-5p* and *miR-150-3p* on the genes.** (A) Expression of *CAV2* and *XIAP* mRNAs 72 h after transfection with 10 nM *miR-150-5p* or *miR-150-3p* into cells. *GUSB* was used as an internal control. \* $P \leq 0.0001$ , \*\* $P < 0.001$ . (B) Expression levels of *ITGA3*, *ITGA6*, and *TNC* 72 h after transfection with 10 nM *miR-150-5p* and/or *miR-150-3p* in HNSCC cells. *GUSB* was used as an internal control. \* $P < 0.0001$ , \*\* $P < 0.005$ .

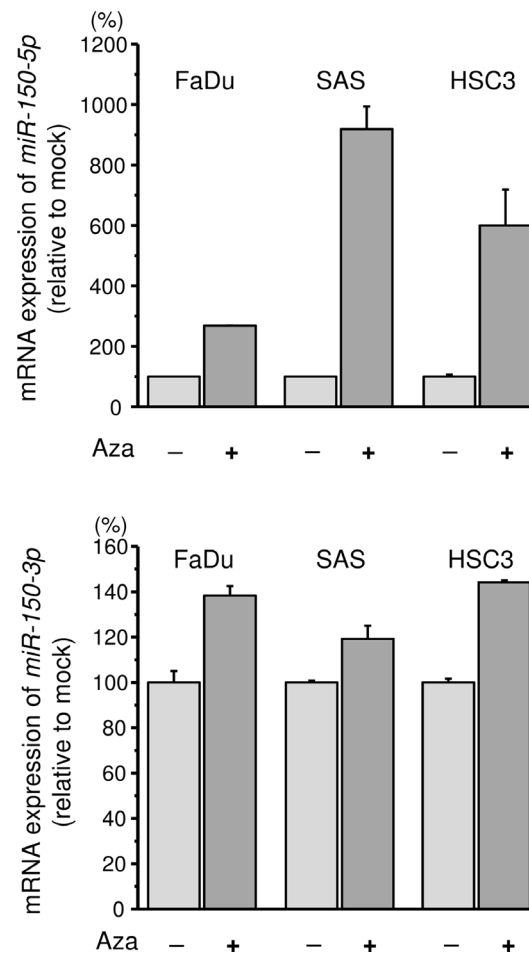

**Supplementary Figure 4: Effects of demethylating agent (5-aza-dC) treatment on HNSCC cells.** Cells were exposed to 5-aza-dC (1  $\mu$ M). After 72 hours, expression levels of *miR-150-5p* and *miR-150-3p* were measured by PCR methods. RNU48 was used as normalization.

## Supplementary Table 1: Details of sequence reads

| Normal epithelia samples | #1       |       | #2       |       | #3       |       | #4       |       | #5       |       | #6       |       |
|--------------------------|----------|-------|----------|-------|----------|-------|----------|-------|----------|-------|----------|-------|
|                          | Count    | (%)   | Count    | (%)   | Count    | (%)   | Count    | (%)   | Count    | (%)   | Count    | (%)   |
| Total reads              | 23679339 | 100   | 21946900 | 100   | 18443975 | 100   | 24404638 | 100   | 16558041 | 100   | 12180452 | 100   |
| 5' adapter contaminants  | 7895     | 0.03  | 8458     | 0.04  | 10466    | 0.06  | 6853     | 0.03  | 1898     | 0.01  | 2339     | 0.02  |
| 3' adapter null          | 6391072  | 26.99 | 7153930  | 32.6  | 4964350  | 26.92 | 6692336  | 27.42 | 1151592  | 6.95  | 2543856  | 20.88 |
| Insert null              | 79308    | 0.33  | 93050    | 0.42  | 120598   | 0.65  | 88669    | 0.36  | 86351    | 0.52  | 188043   | 1.54  |
| Smaller than 15 nt       | 381930   | 1.61  | 476567   | 2.17  | 229982   | 1.25  | 155685   | 0.64  | 437128   | 2.64  | 149148   | 1.22  |
| Longer than 28 nt        | 6783219  | 28.65 | 5494176  | 25.03 | 5447702  | 29.54 | 6020872  | 24.67 | 3193007  | 19.28 | 2604380  | 21.38 |
| Poly A                   | 91       | 0     | 141      | 0     | 116      | 0     | 56       | 0     | 184      | 0     | 22       | 0     |
| Clean Reads              | 10035824 | 42.38 | 8720578  | 39.73 | 7670761  | 41.59 | 11440167 | 46.88 | 11687881 | 70.59 | 6692664  | 54.95 |
| HNSCC samples            | #1       |       | #2       |       | #3       |       | #4       |       | #5       |       | #6       |       |
|                          | Count    | (%)   | Count    | (%)   | Count    | (%)   | Count    | (%)   | Count    | (%)   | Count    | (%)   |
| Total reads              | 21362445 | 100   | 19174524 | 100   | 21930947 | 100   | 22141929 | 100   | 21717298 | 100   | 24845427 | 100   |
| 5' adapter contaminants  | 6126     | 0.03  | 5234     | 0.03  | 4818     | 0.02  | 4299     | 0.02  | 5264     | 0.02  | 3473     | 0.01  |
| 3' adapter null          | 6287386  | 29.43 | 6793708  | 35.43 | 5858570  | 26.71 | 3946545  | 17.82 | 4296546  | 19.78 | 3015325  | 12.14 |
| Insert null              | 89452    | 0.42  | 34526    | 0.18  | 38111    | 0.17  | 55479    | 0.25  | 76408    | 0.35  | 66033    | 0.27  |
| Smaller than 15 nt       | 323869   | 1.52  | 269427   | 1.41  | 514685   | 2.35  | 209630   | 0.95  | 328658   | 1.51  | 241859   | 0.97  |
| Longer than 28 nt        | 5477464  | 25.64 | 5773018  | 30.11 | 6774839  | 30.89 | 6741506  | 30.45 | 3255544  | 14.99 | 5349161  | 21.53 |
| Poly A                   | 112      | 0     | 46       | 0     | 87       | 0     | 95       | 0     | 37       | 0     | 62       | 0     |
| Clean Reads              | 9178036  | 42.96 | 6298565  | 32.85 | 8739837  | 39.85 | 11184375 | 50.51 | 13754841 | 63.34 | 16169514 | 65.08 |

## Supplementary Table 2: Details of alignment statistics

| Normal epithelia samples                                        | #1       |      | #2      |      | #3      |      | #4       |      | #5       |      | #6       |      |
|-----------------------------------------------------------------|----------|------|---------|------|---------|------|----------|------|----------|------|----------|------|
|                                                                 | Count    | (%)  | Count   | (%)  | Count   | (%)  | Count    | (%)  | Count    | (%)  | Count    | (%)  |
| Clean Reads                                                     | 10035824 | 100  | 8720578 | 100  | 7670761 | 100  | 11440167 | 100  | 11687881 | 100  | 6692664  | 100  |
| Aligned reads                                                   | 7826695  | 78   | 6763551 | 77.6 | 6060029 | 79   | 9515626  | 83.2 | 9598214  | 82.1 | 5664692  | 84.6 |
| - Uniquely matched reads                                        | 6051673  | 60.3 | 5520277 | 63.3 | 4633968 | 60.4 | 7667510  | 67   | 7566886  | 64.7 | 4435139  | 66.3 |
| - Multiply matched reads                                        | 1775022  | 17.7 | 1243274 | 14.3 | 1426061 | 18.6 | 1848116  | 16.2 | 2031328  | 17.4 | 1229553  | 18.4 |
| Unaligned reads                                                 | 2056201  | 20.5 | 1782517 | 20.4 | 1487183 | 19.4 | 1838872  | 16.1 | 1940248  | 16.6 | 983994   | 14.7 |
| - No matches found                                              | 1806140  | 18   | 1595243 | 18.3 | 1328557 | 17.3 | 1670868  | 14.6 | 1715989  | 14.7 | 887846   | 13.3 |
| - Too many matches                                              | 250061   | 2.5  | 187274  | 2.1  | 158626  | 2.1  | 168004   | 1.5  | 224259   | 1.9  | 96148    | 1.4  |
| Number of locations aligned Uniquely and Multiply matched reads | 9004184  |      | 7619508 |      | 7081118 |      | 10886607 |      | 11021661 |      | 6736173  |      |
| HNSCC samples                                                   | #1       |      | #2      |      | #3      |      | #4       |      | #5       |      | #6       |      |
|                                                                 | Count    | (%)  | Count   | (%)  | Count   | (%)  | Count    | (%)  | Count    | (%)  | Count    | (%)  |
| Clean Reads                                                     | 9178036  | 100  | 6298565 | 100  | 8739837 | 100  | 11184375 | 100  | 13754841 | 100  | 16169514 | 100  |
| Aligned reads                                                   | 7114159  | 77.5 | 4965770 | 78.8 | 6053433 | 69.3 | 9145089  | 81.8 | 11597592 | 84.3 | 13573321 | 83.9 |
| - Uniquely matched reads                                        | 5877644  | 64   | 4089163 | 64.9 | 4601566 | 52.7 | 8043485  | 71.9 | 9465308  | 68.8 | 11000284 | 68   |
| - Multiply matched reads                                        | 1236515  | 13.5 | 876607  | 13.9 | 1451867 | 16.6 | 1101604  | 9.8  | 2132284  | 15.5 | 2573037  | 15.9 |
| Unaligned reads                                                 | 1933101  | 21.1 | 1239192 | 19.7 | 2421581 | 27.7 | 1965018  | 17.6 | 2086889  | 15.2 | 2494236  | 15.4 |
| - No matches found                                              | 1714741  | 18.7 | 1055087 | 16.8 | 1981443 | 22.7 | 1790540  | 16   | 1912633  | 13.9 | 2280134  | 14.1 |
| - Too many matches                                              | 218360   | 2.4  | 184105  | 2.9  | 440138  | 5    | 174478   | 1.6  | 174256   | 1.3  | 214102   | 1.3  |
| Number of locations aligned Uniquely and Multiply matched reads | 8085627  |      | 5690747 |      | 7502945 |      | 10025234 |      | 13663064 |      | 15951587 |      |

### Supplementary Table 3: Annotation of reads aligned to small RNAs

| Normal epithelia samples | #1      |       | #2      |       | #3      |       | #4       |       | #5       |       | #6      |       |
|--------------------------|---------|-------|---------|-------|---------|-------|----------|-------|----------|-------|---------|-------|
|                          | Count   | (%)   | Count   | (%)   | Count   | (%)   | Count    | (%)   | Count    | (%)   | Count   | (%)   |
| Total locations          | 9004184 | 100   | 7619508 | 100   | 7081118 | 100   | 10886607 | 100   | 11021661 | 100   | 6736173 | 100   |
| miRNA                    | 7985677 | 88.69 | 6665278 | 87.48 | 5980706 | 84.46 | 9905833  | 90.99 | 9722647  | 88.21 | 6057813 | 89.93 |
| scRNA                    | 7304    | 0.08  | 5941    | 0.08  | 5468    | 0.08  | 5291     | 0.05  | 7826     | 0.07  | 5692    | 0.08  |
| scRNA_pseudo             | 3710    | 0.04  | 2007    | 0.03  | 2972    | 0.04  | 1348     | 0.01  | 1681     | 0.02  | 1104    | 0.02  |
| snRNA                    | 19246   | 0.21  | 40205   | 0.53  | 8143    | 0.11  | 5765     | 0.05  | 9836     | 0.09  | 3183    | 0.05  |
| snRNA_pseudo             | 170     | 0.00  | 723     | 0.01  | 59      | 0.00  | 31       | 0.00  | 30       | 0.00  | 15      | 0.00  |
| snoRNA                   | 766558  | 8.51  | 691987  | 9.08  | 910311  | 12.86 | 780185   | 7.17  | 1069951  | 9.71  | 586812  | 8.71  |
| snoRNA_pseudo            | 37      | 0.00  | 34      | 0.00  | 41      | 0.00  | 60       | 0.00  | 167      | 0.00  | 49      | 0.00  |
| tRNA                     | 125358  | 1.39  | 107289  | 1.41  | 93618   | 1.32  | 102256   | 0.94  | 81339    | 0.74  | 38784   | 0.58  |
| tRNA_pseudo              | 1526    | 0.02  | 1148    | 0.02  | 919     | 0.01  | 1236     | 0.01  | 1067     | 0.01  | 761     | 0.01  |
| Unknown                  | 94598   | 1.05  | 104896  | 1.38  | 78881   | 1.11  | 84602    | 0.78  | 127117   | 1.15  | 41960   | 0.62  |

  

| HNSCC samples   | #1      |       | #2      |       | #3      |       | #4       |       | #5       |       | #6       |       |
|-----------------|---------|-------|---------|-------|---------|-------|----------|-------|----------|-------|----------|-------|
|                 | Count   | (%)   | Count   | (%)   | Count   | (%)   | Count    | (%)   | Count    | (%)   | Count    | (%)   |
| Total locations | 8085627 | 100   | 5690747 | 100   | 7502945 | 100   | 10025234 | 100   | 13663064 | 100   | 15951587 | 100   |
| miRNA           | 7215729 | 89.24 | 5101981 | 89.65 | 6428347 | 85.68 | 9283993  | 92.61 | 12852920 | 94.07 | 14811960 | 92.86 |
| scRNA           | 19098   | 0.24  | 9312    | 0.16  | 15689   | 0.21  | 7521     | 0.08  | 8438     | 0.06  | 18489    | 0.12  |
| scRNA_pseudo    | 6804    | 0.08  | 1585    | 0.03  | 4097    | 0.05  | 1331     | 0.01  | 1600     | 0.01  | 2611     | 0.02  |
| snRNA           | 11610   | 0.14  | 22812   | 0.40  | 46239   | 0.62  | 18325    | 0.18  | 16682    | 0.12  | 41466    | 0.26  |
| snRNA_pseudo    | 141     | 0.00  | 71      | 0.00  | 247     | 0.00  | 24       | 0.00  | 47       | 0.00  | 71       | 0.00  |
| snoRNA          | 625071  | 7.73  | 394915  | 6.94  | 657859  | 8.77  | 514946   | 5.14  | 631060   | 4.62  | 899820   | 5.64  |
| snoRNA_pseudo   | 72      | 0.00  | 68      | 0.00  | 134     | 0.00  | 94       | 0.00  | 215      | 0.00  | 240      | 0.00  |
| tRNA            | 143407  | 1.77  | 104766  | 1.84  | 266087  | 3.55  | 136841   | 1.36  | 89807    | 0.66  | 105502   | 0.66  |
| tRNA_pseudo     | 1338    | 0.02  | 1766    | 0.03  | 2813    | 0.04  | 1657     | 0.02  | 1272     | 0.01  | 1481     | 0.01  |
| Unknown         | 62357   | 0.77  | 53471   | 0.94  | 81433   | 1.09  | 60502    | 0.60  | 61023    | 0.45  | 69947    | 0.44  |

**Supplementary Table 4A: Downregulated miRNAs identified by deep sequencing of HNSCC clinical specimens. See Supplementary\_Table\_4**

**Supplementary Table 4B: Upregulated miRNAs identified by deep sequencing of HNSCC clinical specimens. See Supplementary\_Table\_4**
